# Supplementary material for: The von Willebrand Factor Facilitates Model for End‐Stage Liver Disease–Independent Risk Stratification on the Waiting List for Liver Transplantation
Source: PubMed Central journal article supplement — Hepatology. 2020 Apr 23;72(2):584–94. doi: 10.1002/hep.31047 (PMC7497135; doi:10.1002/hep.31047), 2020-04-23
Supplement: HEP-72-584-s001.pdf [file HEP-72-584-s001.pdf]

## **Supplement to:**

### **Von Willebrand factor facilitates MELD-independent risk stratification on the waiting list for liver transplantation**

Georg P. Györi<sup>1,a</sup>, David Pereyra<sup>2,a</sup>, Benedikt Rumpf<sup>2</sup>, Hubert Hackl<sup>3</sup>, Christoph Köditz<sup>2</sup>, Gregor Ortmayr<sup>2</sup>, Thomas Reiberger<sup>4</sup>, Michael Trauner<sup>4</sup>, Gabriela A. Berlakovich<sup>1,#</sup>, Patrick Starlinger<sup>2</sup>

<sup>1</sup> Division of Transplantation, Department of Surgery, Medical University of Vienna, General Hospital Vienna, Austria

<sup>2</sup> Division of General Surgery, Department of Surgery, Medical University of Vienna, General Hospital Vienna, Austria

<sup>3</sup> Division of Bioinformatics, Biocenter, Medical University of Innsbruck, Austria

<sup>4</sup> Division of Gastroenterology and Hepatology, Department of Internal Medicine III, Medical University of Vienna, General Hospital Vienna, Austria

<sup>a</sup> Equally contributing first authors

<sup>#</sup> Corresponding author

#### **Contact Information:**

Gabriela A. Berlakovich,

Department of Transplantation, Medical University of Vienna,

Waehringer Guertel 18-20, 1090 Vienna, Austria

Tel: (+43) 01-40400-68960; E-mail: gabriela.berlakovich@meduniwien.ac.at

[www.tellvienna.com](http://www.tellvienna.com)

**Short Title:** vWF-Ag predicts outcome on liver transplant waiting list

**Financial Support:** No funding was received for this study.

**Conflict of Interest:** The authors declare to have no conflict of interest.

**Authors contributions:** All listed authors have 1) made substantial contributions to conception and design, acquisition of data, and/or its analysis/interpretation 2) participated in drafting the article or revising it critically for important intellectual content 3) given final approval of the version to be published.

## Supplemental Tables

| <b>Supplemental Table 1. Cohort Comparison</b> |                                 |                                            |                |
|------------------------------------------------|---------------------------------|--------------------------------------------|----------------|
| <b>Parameter</b>                               | <b>Study Cohort<br/>(N=269)</b> | <b>Patients without vWF-Ag<br/>(N=770)</b> | <b>p-value</b> |
|                                                | <b>Median (range)<br/>N (%)</b> | <b>Median (range)<br/>N (%)</b>            |                |
| <b>Sex</b>                                     |                                 |                                            | 0.121          |
| Male                                           | 203 (75.5)                      | 543 (70.5)                                 |                |
| Female                                         | 66 (24.5)                       | 227 (29.5)                                 |                |
| <b>Age at listing (years)</b>                  | 56 (15-73)                      | 54 (0-72)                                  | <b>0.004</b>   |
| <b>Patients ≤ 15 years</b>                     | 1 (0.4)                         | 25 (3.2)                                   | <b>0.009</b>   |
| <b>MELD score</b>                              | 16 (6-40)                       | 16 (6-40)                                  | 0.700          |
| <b>Indication for LTx</b>                      |                                 |                                            |                |
| Alcoholic cirrhosis                            | 89 (33.1)                       | 251 (32.6)                                 | 0.883          |
| Tumor                                          | 62 (23.0)                       | 160 (20.8)                                 | 0.434          |
| Viral hepatitis                                | 42 (15.6)                       | 151 (19.6)                                 | 0.147          |
| Biliary disorders                              | 23 (8.6)                        | 76 (9.9)                                   | 0.526          |
| AI hepatitis                                   | 14 (5.2)                        | 23 (3.0)                                   | 0.091          |
| Cryptogenic cirrhosis                          | 13 (4.8)                        | 33 (4.3)                                   | 0.707          |
| Other indications                              | 26 (9.7)                        | 76 (9.9)                                   | 0.923          |
| <b>Incidence of waiting list outcome*</b>      |                                 |                                            | 0.697          |
| Transplanted                                   | 196 (72.9)                      | 390 (71.6)                                 |                |
| DoL                                            | 73 (27.1)                       | 155 (28.4)                                 |                |
| Three-month mortality                          | 31 (11.5)                       | 94 (12.2)                                  | 0.772          |

vWF-Ag= von Willebrand factor antigene, MELD= model of end-stage liver disease, AI=autoimmune,  
DoL = death on list.

\*after exclusion of de-listed patients.

## Supplemental Figures

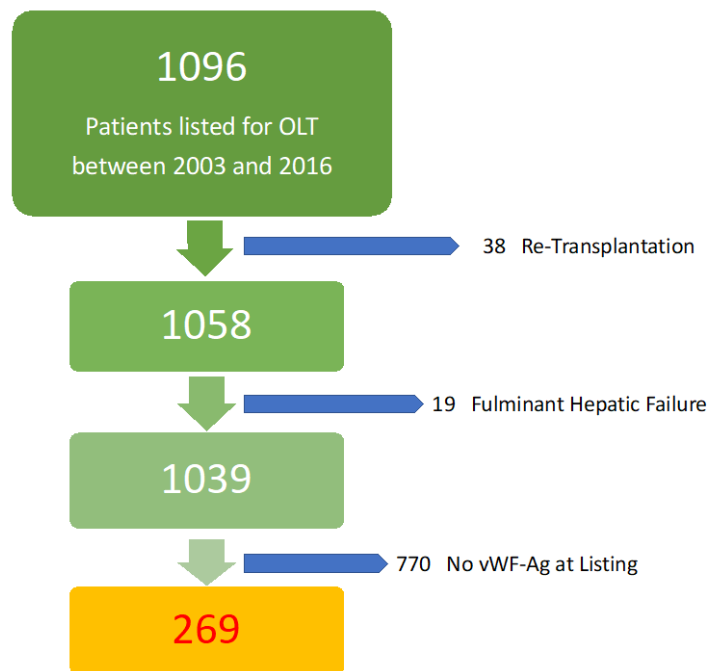

*Supplemental Fig.1 Flowchart illustrating the number and reasons for patient exclusion.*

This figure illustrates the exclusion process of patients. Of note, no data for vWF-Ag was available for patients that were excluded due to clinical deterioration. Within the final cohort (N=269), 31 patients died within the first three months on the waiting list, who were compared to the remaining cohort consisting of patients who already underwent OLT at this time point and patients who survived at least three months on the waiting list.

(OLT = orthotopic liver transplantation)

**A** Distribution of Patients (absolute)

|                       |         |         |         |       |     |
|-----------------------|---------|---------|---------|-------|-----|
| vWF-Ag (%)            | > 750   | 0       | 0       | 0     | 3   |
|                       | 500-749 | 2       | 8       | 11    | 8   |
|                       | 250-499 | 5       | 24      | 57    | 122 |
|                       | < 250   | 0       | 0       | 3     | 26  |
| N = 269               | < 125   | 125-129 | 130-134 | > 135 |     |
| Serum Sodium (mmol/L) |         |         |         |       |     |

**B** Distribution of Patients (relative)

|                       |         |         |         |         |  |
|-----------------------|---------|---------|---------|---------|--|
| vWF-Ag (%)            | > 750   | 3.72 %  |         | 8.18 %  |  |
|                       | 500-749 |         |         |         |  |
|                       | 250-499 | 10.78 % |         | 77.32 % |  |
|                       | < 250   |         |         |         |  |
| N = 269               | < 125   | 125-129 | 130-134 | > 135   |  |
| Serum Sodium (mmol/L) |         |         |         |         |  |

**C** Incidence of Three-Month Mortality

|                       |         |         |         |         |  |
|-----------------------|---------|---------|---------|---------|--|
| vWF-Ag (%)            | > 750   | 40.00 % |         | 18.20 % |  |
|                       | 500-749 |         |         |         |  |
|                       | 250-499 | 6.90 %  |         | 10.10 % |  |
|                       | < 250   |         |         |         |  |
| N = 269               | < 125   | 125-129 | 130-134 | > 135   |  |
| Serum Sodium (mmol/L) |         |         |         |         |  |

*Supplemental Fig.2 Association of vWF-Ag with sodium in patients awaiting OLT.*

In order to evaluate a potential redundancy of vWF-Ag and serum sodium correlative analysis was performed. The distribution of patients is shown in absolute (A) as well as in relative (B) measures. Further, the incidence of three-month mortality is shown in regard to levels of vWF-Ag and serum sodium.

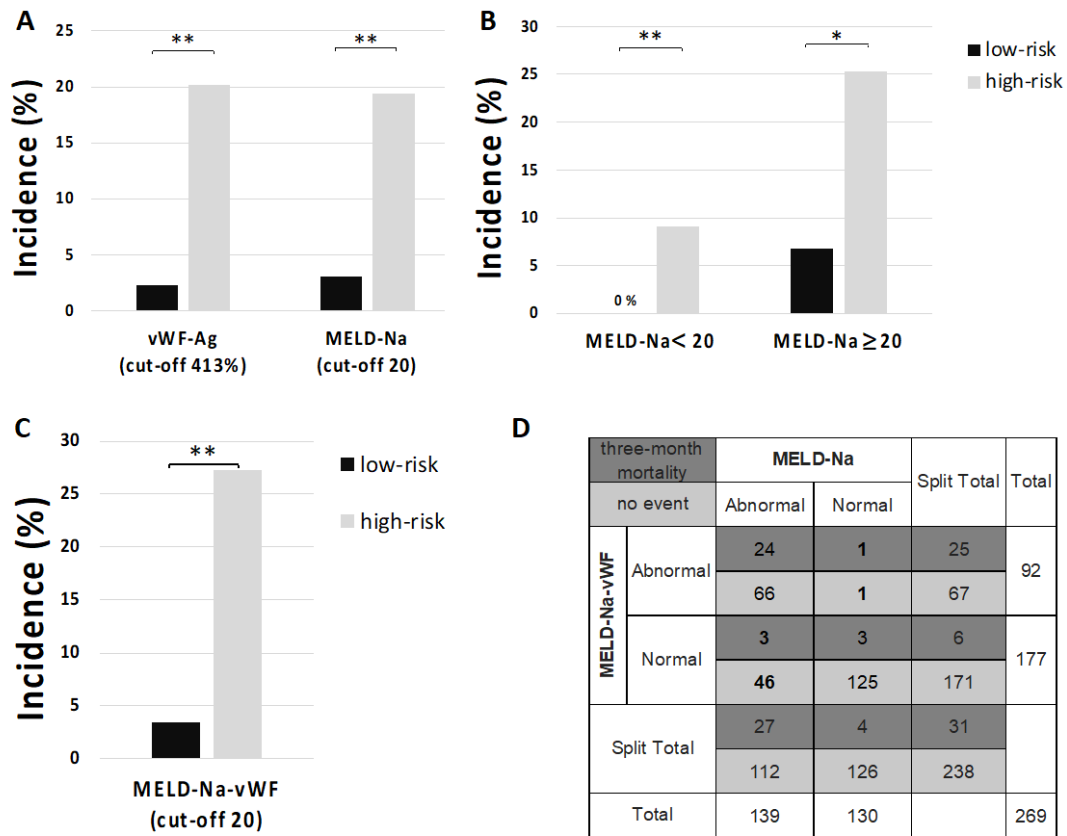

*Supplemental Fig.3 VWF-Ag allows risk stratification on the waiting list independent of MELD-Na and its incorporation does improve the predictive potential for three-month survival on the waiting list.*

The cohort was divided according to the defined cut-off for vWF-Ag at 413%. Patients above this cut-off were found to show a significantly higher incidence for mortality within three months on the waiting list, which was comparable to a MELD-Na cut-off at 20 points (A). Interestingly, vWF-Ag was found to sub-stratify patients also in patients with low (<20) and high (≥20) MELD-Na score (B). Subsequently, the optimal cut-off for MELD-Na-vWF was identified at 20 points, which shows a good discriminatory potential for three-month survival (C). Further, net reclassification improvement (NRI) was calculated (D), which shows an improvement in the predictive potential of MELD-Na when vWF-Ag was included. (\* p<0.05, \*\* p<0.005)

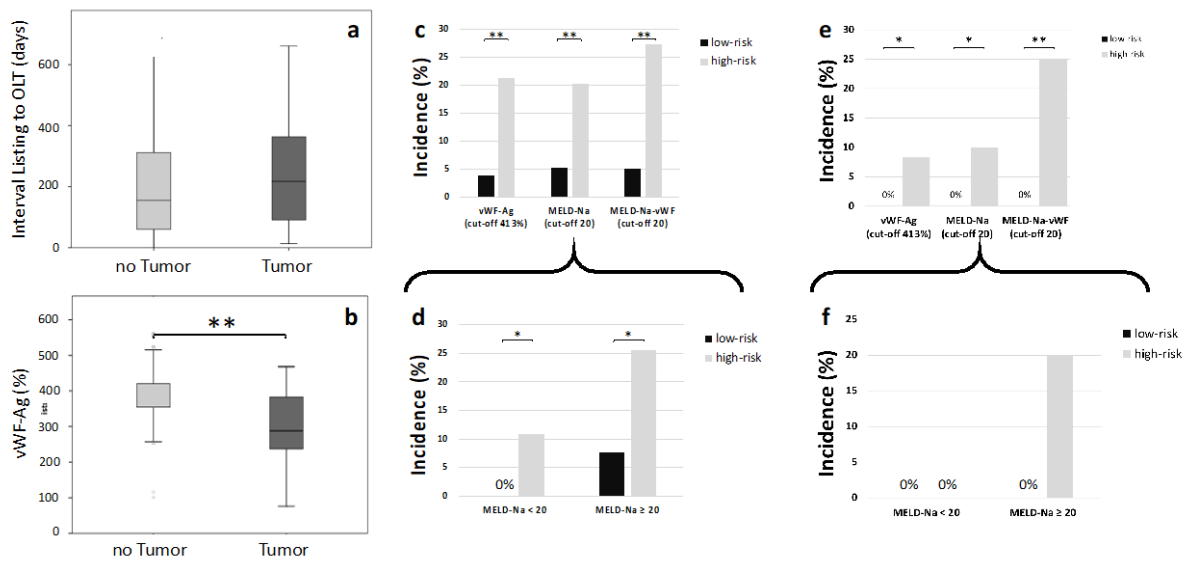

*Supplemental Fig.4 Subgroup analysis.*

As patients suffering from tumors were previously shown to have an advantage in terms of waiting list survival, an additional subgroup analysis was performed in this cohort (Tumor) as well as for the remaining cohort (no Tumor). Interestingly, at our institution patients with tumors show a tendency towards a longer waiting period on the list prior to OLT when compared to patients suffering from chronic liver diseases (median Interval no Tumor = 155 days, median Interval Tumor = 218 days,  $p=0.092$ ; a). Further, patients with tumor showed lower levels of vWF-Ag at listing when compared to the remaining cohort (median vWF-Ag no Tumor = 420%, median vWF-Ag Tumor = 288%,  $p<0.001$ ; b). Of note, the data for prediction of early waiting list mortality (i.e. < 3 months) was reproducible after exclusion of tumor patients (vWF-Ag: 3 of 80 [3.8%] in vWF-Ag<sub>low</sub> vs 27 of 127 [21.3%] in vWF-Ag<sub>high</sub>,  $p<0.001$ ; MELD-Na: 4 of 78 [5.1%] in MELD-Na<sub>low</sub> vs 26 of 129 [20.2%] in MELD-Na<sub>high</sub>,  $p=0.003$ ; MELD-Na-vWF: 6 of 119 [5.0%] in MELD-Na-vWF<sub>low</sub> vs 24 of 88 [27.3%] in MELD-Na-vWF<sub>high</sub>,  $p<0.001$ ; c). This was also the case for the prediction of early waiting list mortality according to vWF-Ag after dividing the cohort in patients with low or high MELD-Na scores (MELD-Na < 20: 0 of 41 [0.0%] in vWF-Ag<sub>low</sub> vs 4 of 37 [10.8%] in vWF-Ag<sub>high</sub>,  $p=0.031$ ; MELD-Na ≥ 20: 3 of 39 [7.7%] in vWF-Ag<sub>low</sub> vs 23 of 90 [25.6%] in vWF-Ag<sub>high</sub>,  $p=0.020$ ; d). Ultimately, the cohort of tumor patients was analyzed separately, which revealed a consistency of the data gathered in the entire cohort. Patients with tumors and dyeing within three months on the waiting list were identified by all predictive parameters assessed (vWF-Ag: 0 of 50 [0.0%] in vWF-Ag<sub>low</sub> vs 1 of 12 [8.3%] in vWF-

Aghigh,  $p=0.040$ ; MELD-Na: 0 of 52 [0.0%] in MELD-Nalow vs 1 of 10 [10.0%] in MELD-Nahigh,  $p=0.022$ ; MELD-Na-vWF: 0 of 58 [0.0%] in MELD-Na-vWF<sub>low</sub> vs 1 of 4 [25.0%] in MELD-Na-vWF<sub>high</sub>,  $p<0.001$ ; e). Again, the prediction according to vWF-Ag held through after stratification into MELD-Na low/high patients (MELD-Na < 20: 0 of 45 [0.0%] in vWF-Ag<sub>low</sub> vs 0 of 7 [0.0%] in vWF-Ag<sub>high</sub>,  $p=NA$ ; MELD-Na  $\geq$  20: 0 of 5 [0.0%] in vWF-Ag<sub>low</sub> vs 1 of 5 [20.0%] in vWF-Ag<sub>high</sub>,  $p=0.292$ ; f). \* $p<0.05$ , \*\* $p<0.005$ .
